# Supplementary material
Source: PubMed Central journal article supplement (PMC11028189)
Supplement: 262_2019_2417_MOESM1_ESM.pdf [file 262_2019_2417_MOESM1_ESM.pdf]

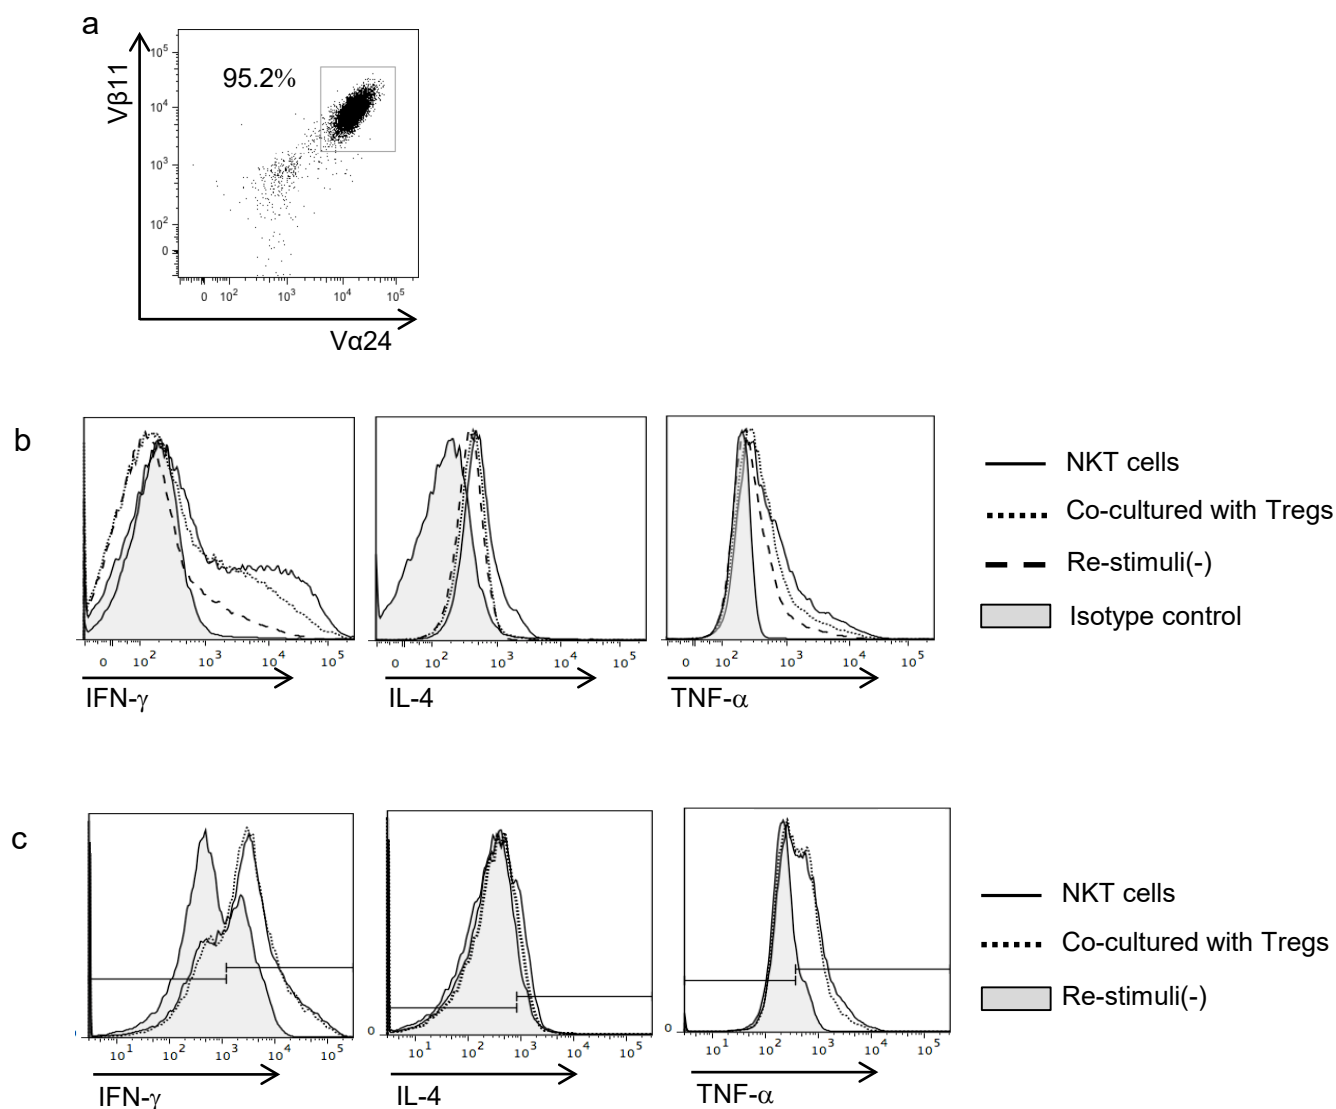

### Fig. S1 Suppressive effects of Tregs on cytokine production of NKT cells

(a) Representative profile of isolated NKT cells. (b) Representative FACS profiles. The *solid line* histogram indicates NKT cells cultured without Tregs, the *dotted line* histogram indicates NKT cells co-cultured with Tregs, the *dashed line* histogram indicates NKT cells without re-stimulation [re-stimuli(-)], and the *gray-shaded* histogram indicates the isotype control. (c) The levels of IFN- $\gamma$ , IL-4, and TNF- $\alpha$  secretion by NKT cells were evaluated with flow cytometry. The *solid line* histogram indicates NKT cells re-stimulated in the absence of Tregs, the *dotted line* histogram indicates NKT cells re-stimulated with Tregs, and the *gray-shaded* histogram indicates NKT cells without re-stimulation.

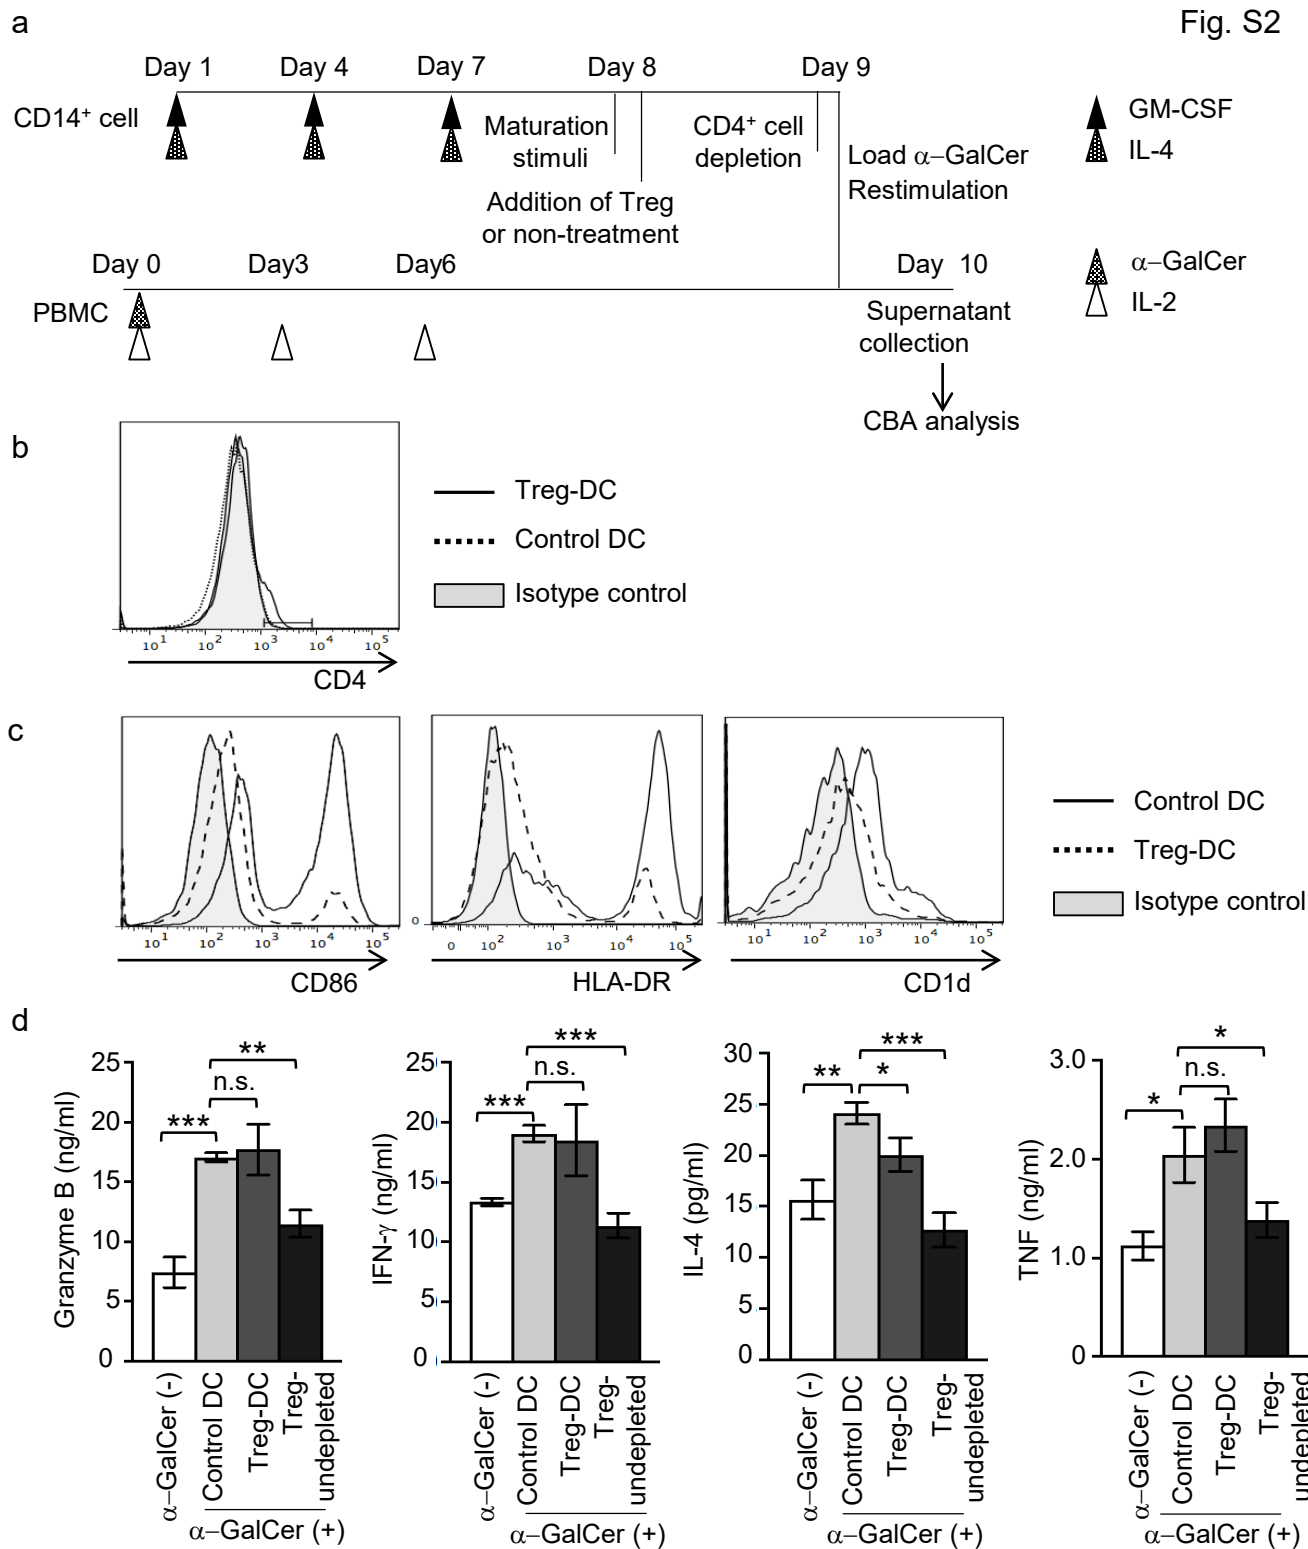

**Fig. S2 Restimulation of NKT cells with DCs pre-incubated with Tregs**

**(a)** The schedule of the assay. DCs derived from CD14<sup>+</sup> cells were matured upon OK-432 stimuli with (Treg-DC) or without Tregs (Control DC). After 24 hours, CD4<sup>+</sup> cells were depleted from these cells using autoMACS. The cultured NKT cells were restimulated with  $\alpha$ -GalCer-pulsed DCs (control-DC or Treg-DC). After 24-hours incubation, the supernatant was collected and CBA was performed to evaluate the cytokine production. **(b)** CD4 and **(c)** CD86, HLA-DR and CD1d expressions on DCs after CD4<sup>+</sup> cell depletion using autoMACS; the *solid line* histogram indicates the control DC, the *dotted line* histogram indicates Treg-DC and the *gray-shaded* histogram indicates the isotype  $\alpha$ . **(D)** The levels of granzyme B, IFN- $\gamma$ , IL-4, and TNF in supernatants of NKT cell cultures are shown. Data are shown as means  $\pm$  SD. Statistical comparisons were performed using unpaired *t*-tests. \**p* < 0.05, \*\**p* < 0.01, \*\*\**p* < 0.001.  $\alpha$ -GalCer:  $\alpha$ -galactosylceramide, CBA: Cytometric beads assay, n.s.: not significant.

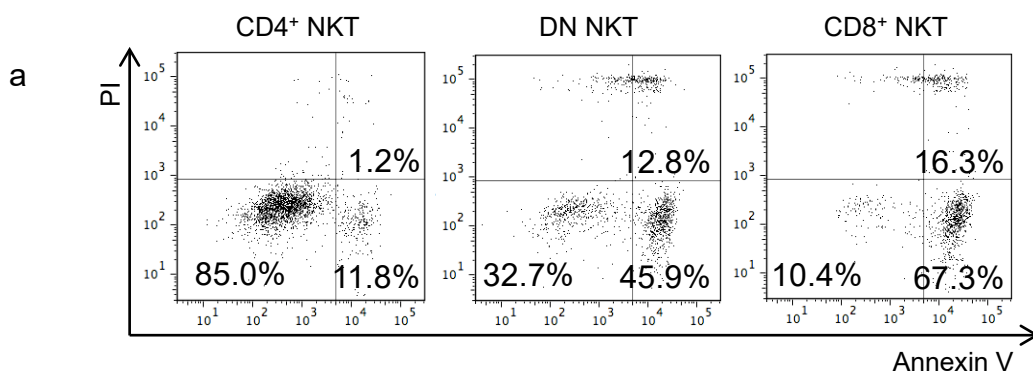

**Fig. S3 Cytotoxic activity of each subset of NKT cells**

(a) Representative Annexin V-PI staining pattern of each subset at an E:T ratio of 10:1 is shown. CD4<sup>+</sup> NKT:CD4<sup>+</sup> NKT cells, DN NKT:CD4<sup>-</sup>CD8<sup>-</sup> NKT cells, and CD8<sup>+</sup> NKT:CD8<sup>+</sup> NKT cells

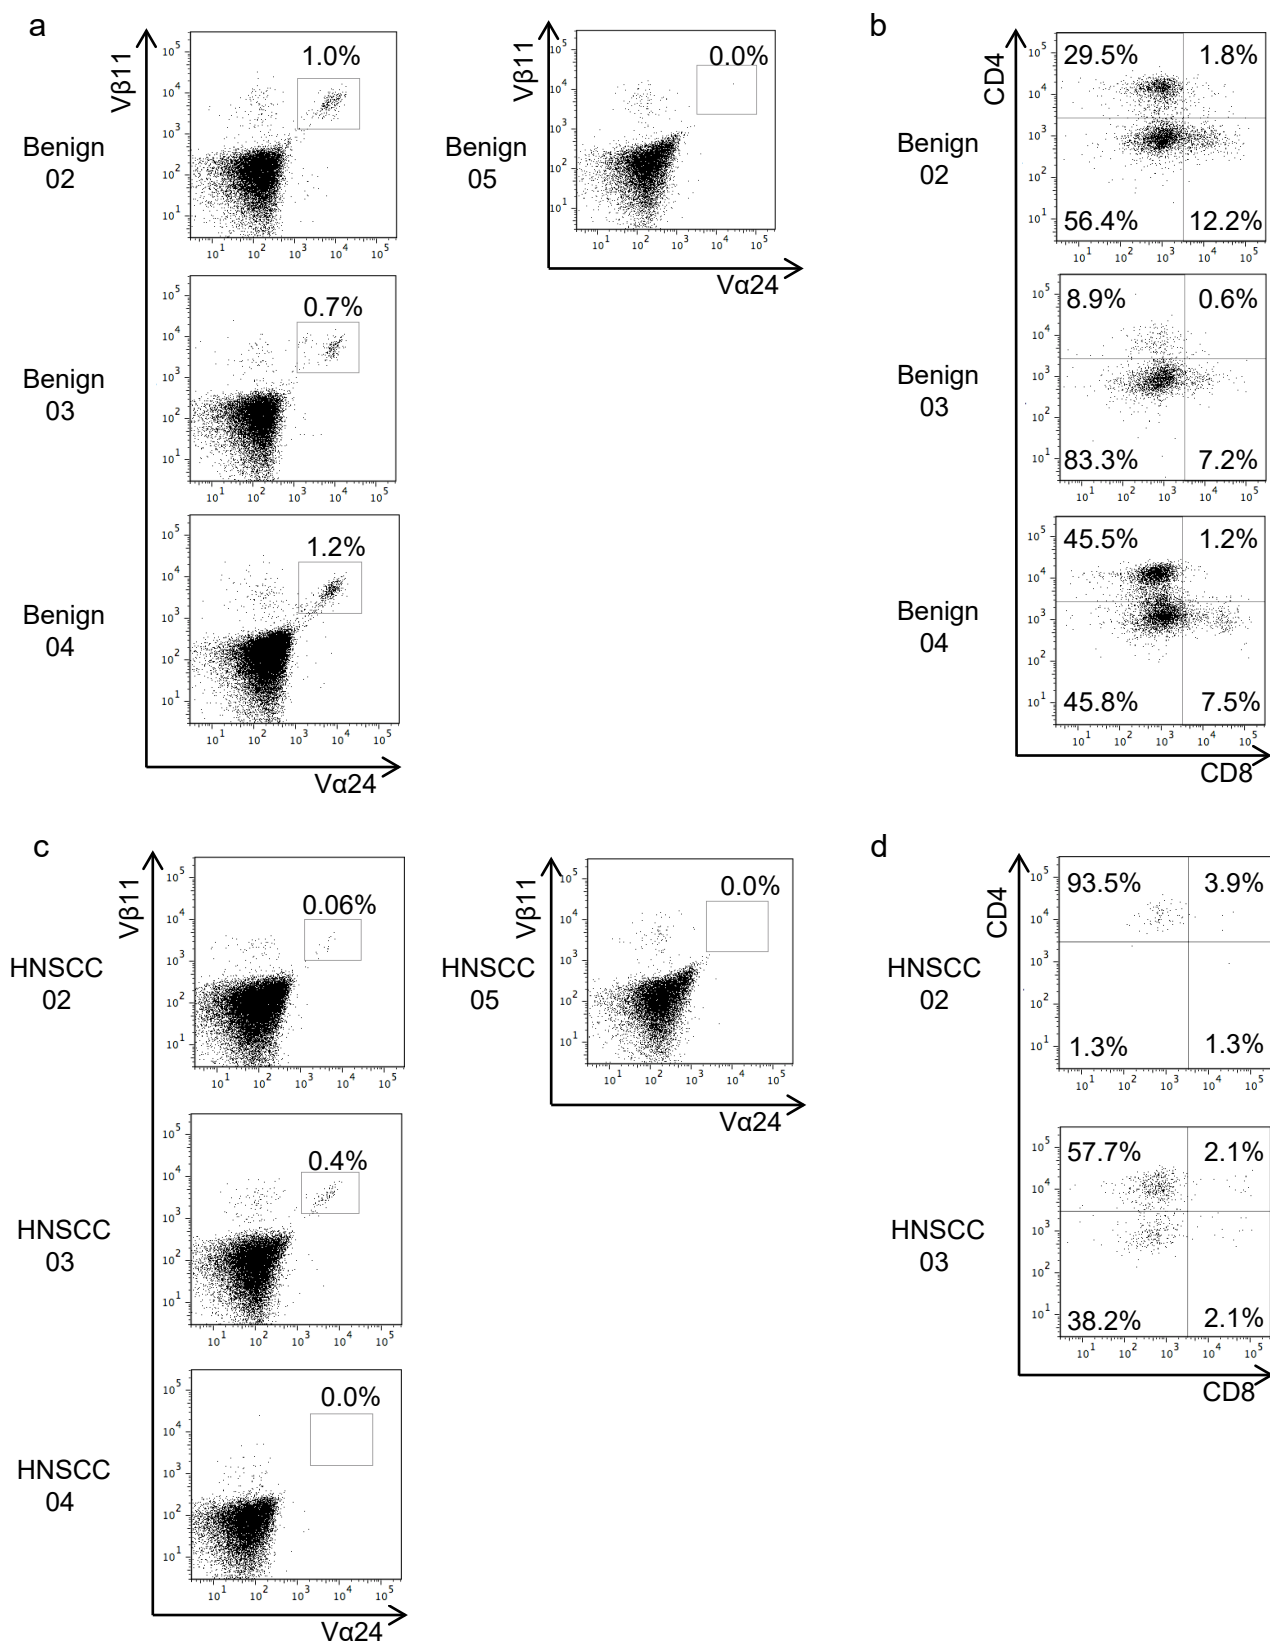

**Fig. S4 Frequency and CD4/CD8 expression of NKT cells**

The frequencies and the CD4/CD8 expressions of cultured NKT cells obtained from patients with benign tumors (**a and b**) and malignant tumors (**c and d**) are shown. The CD4/CD8 expressions of the three cases, Benign 05, HNSCC 04 and HNSCC 05, were not indicated because of their lack of NKT cell expansion. Benign: patients with benign tumors, HNSCC: patients with head and neck squamous cell carcinoma
